# Supplementary material
Source: Royal Society of Chemistry journal article supplement (doi:10.1039/d5ta08055j)
Supplement: d5ta08055j1.pdf [file d5ta08055j1.pdf]

## Supporting Information

### Water-Stable Direct Air Capture of CO<sub>2</sub> with Microcapsules of Task-Specific Ionic Liquid and their Electrothermal Regeneration

Luma Al-Mahbobi,<sup>a</sup> Smita S. Dasari,<sup>b</sup> Aidan Klemm,<sup>c</sup> Harry M. Meyer III,<sup>d</sup> Yue Yuan,<sup>d</sup> Micah J. Green,<sup>a,b</sup> Emily Pentzer,<sup>a,e\*</sup> Michelle K. Kidder<sup>c\*</sup>

*a. Department of Materials Science and Engineering, Texas A&M University, College Station, Texas 77843, USA*

*b. Artie McFerrin Department of Chemical Engineering, Texas A&M University, College Station, Texas 77843, USA*

*c. Energy Science and Technology Directorate, Oak Ridge National Laboratory, Oak Ridge, Tennessee 37831, United States*

*d. Physical Sciences Directorate, Oak Ridge National Laboratory, Oak Ridge, Tennessee 37831, United States*

*e. Department of Chemistry, Texas A&M University, College Station, Texas 77843, USA*

\*Corresponding Authors: emilypentzer@tamu.edu, kidderm@ornl.gov

### Optical Microscopy Images of Capsules

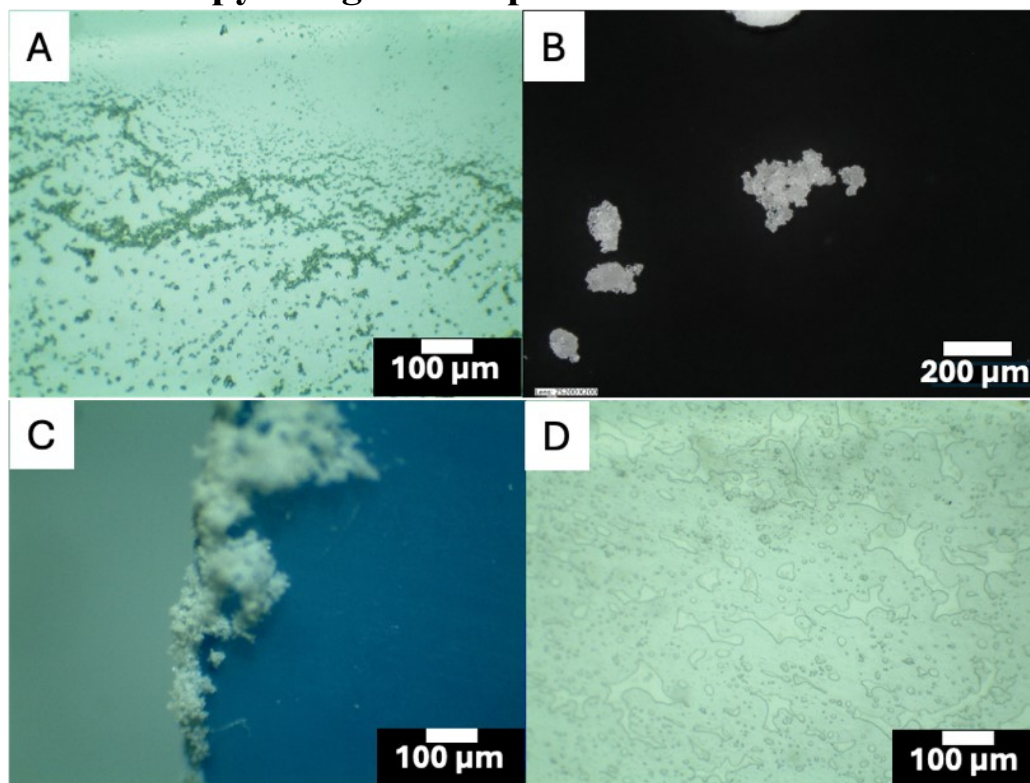

**Figure S1.** Optical microscopy images of PDMS-PU capsules of [EMIM][2CNpyr] core showing (A) capsules in octane, (B) dry capsules (C) capsules scraped with spatula, and (D) squished capsules.

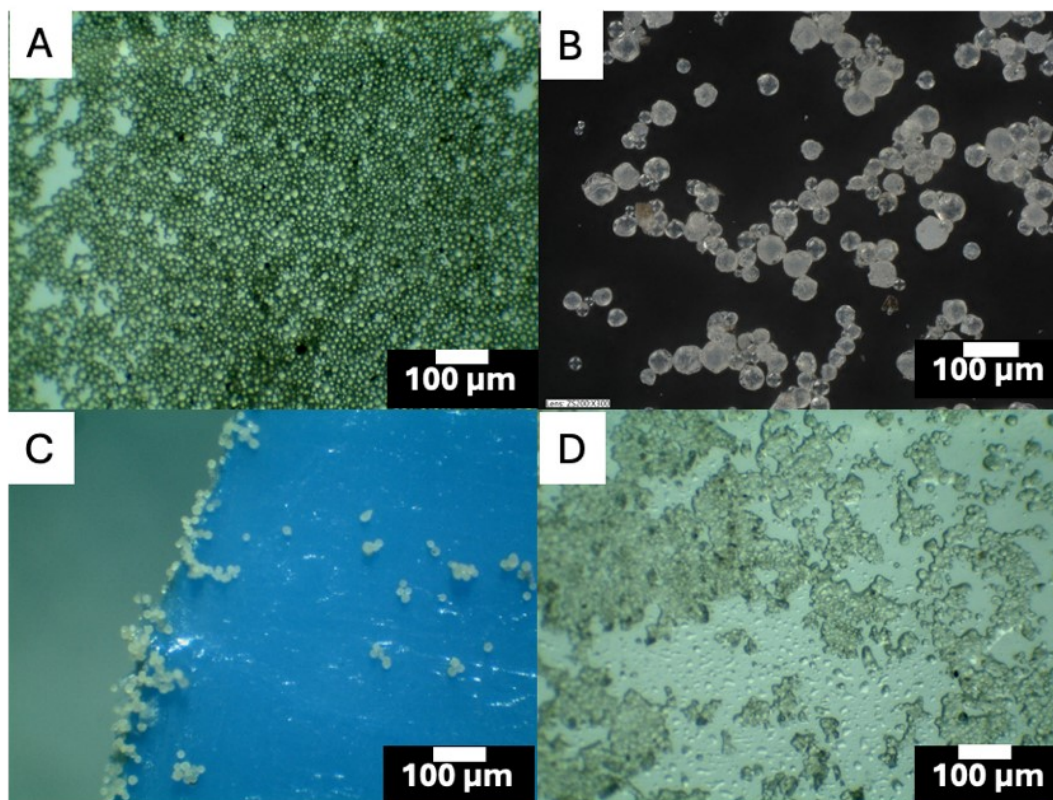

**Figure S2.** Optical microscopy images of GO-PDMS capsules of [EMIM][2CNpyr] core showing (A) capsules in octane, (B) dry capsules (C) capsules scraped with spatula, and (D) squished capsules.

## MGO Characterization

**Figure S3** presents the FTIR spectra of M-GO, confirming the functionalization of GO. The characteristic  $sp^3$  C-H stretching vibrations between 2850 and 2950  $cm^{-1}$  indicate the presence of alkyl chains, supporting the alkylation of GO. Additionally, successful PDMS grafting is evident from the Si-C-H (1256  $cm^{-1}$ ) and Si-O (1009  $cm^{-1}$ ) peaks. The inset image shows MGO (C18-PDMS-GO) dispersed in octane (10 mg/mL), demonstrating its dispersibility in nonpolar solvents, further validating the functionalization.

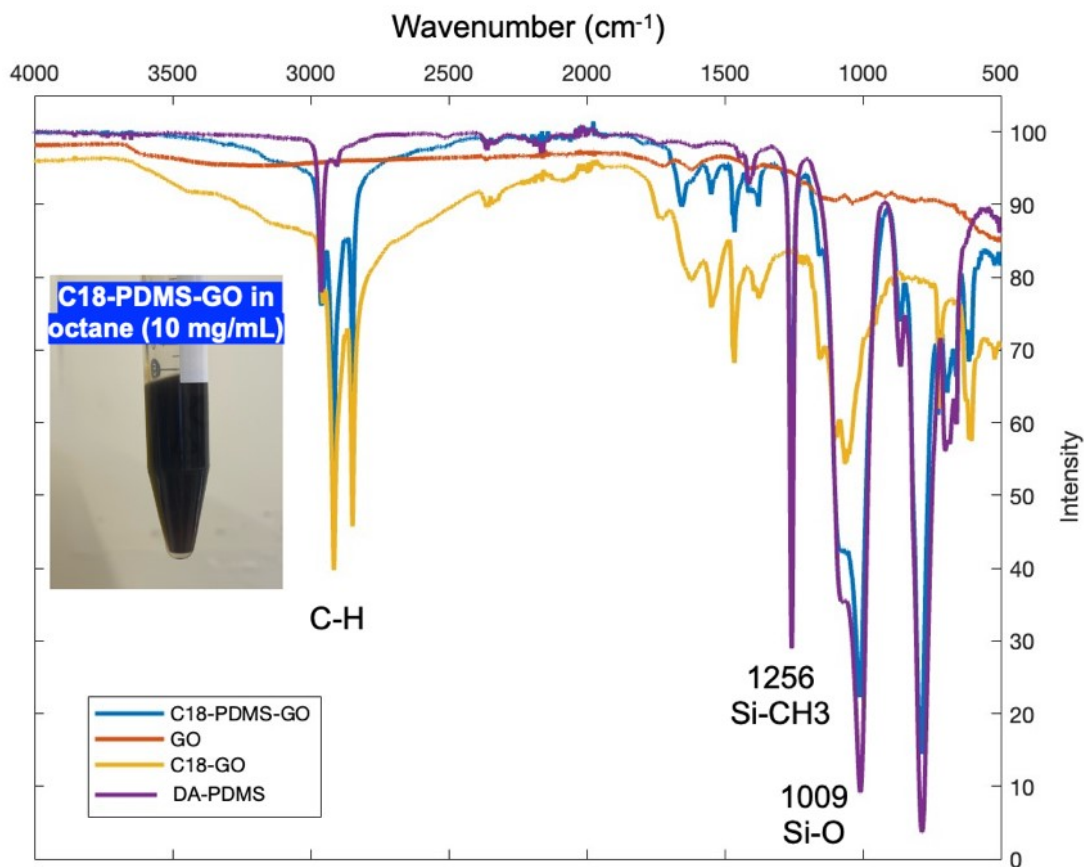

**Figure S3.** FTIR spectra of GO, C<sub>18</sub>-GO, MGO (C<sub>18</sub>-PDMS-GO), and DA-PDMS (diamino-PDMS)

# XPS Spectra

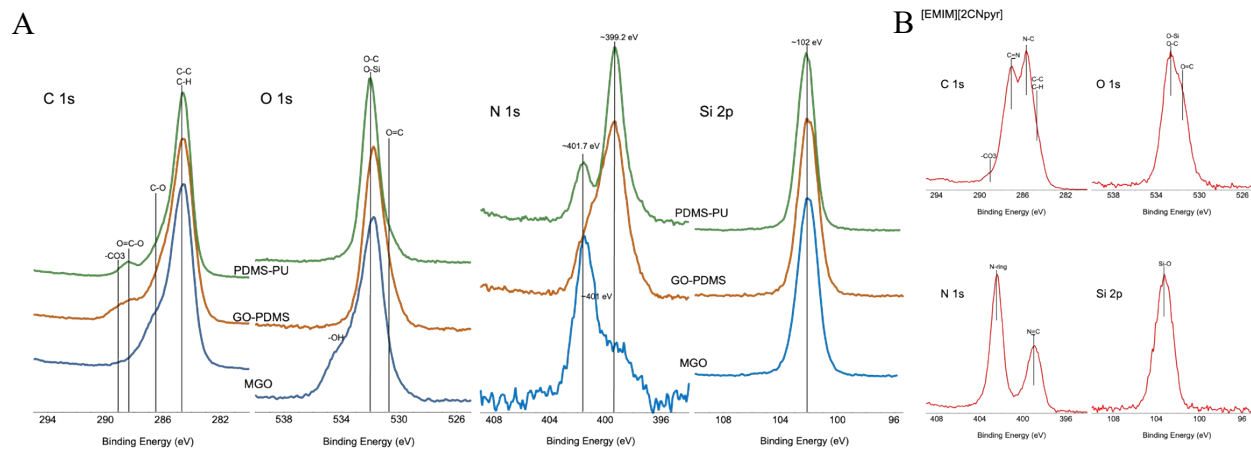

**Figure S4.** XPS spectra of (A) PDMS-PU, GO-PDMS, MGO (C<sub>18</sub>-PDMS-GO), and (B) [EMIM][2CNpyr] (The observation of Si 2p binding energy in [EMIM][2CNpyr] may be due to cross-contamination during sample preparation)

**Table S1.** XPS at.% surface composition

|                          | Surface Composition (at.%) |      |      |      |     |     |     |
|--------------------------|----------------------------|------|------|------|-----|-----|-----|
|                          | C                          | N    | O    | Si   | S   | K   | Mn  |
| GO                       | 56.0                       | 4.1  | 34.4 | 0.7  | 3.8 | 0.5 | 0.5 |
| C <sub>18</sub> -PDMS-GO | 57.8                       | 2.7  | 23.0 | 15.8 | 0.8 | 0.0 | 0.0 |
| [EMIM][2CNpyr]           | 69.3                       | 17.7 | 9.6  | 3.3  | 0.0 | 0.0 | 0.0 |
| GO-PDMS                  | 61.0                       | 11.0 | 17.4 | 10.7 | 0.0 | 0.0 | 0.0 |
| PDMS-PU                  | 57.1                       | 7.8  | 19.5 | 15.6 | 0.0 | 0.0 | 0.0 |

# $^1\text{H}$ NMR Spectra

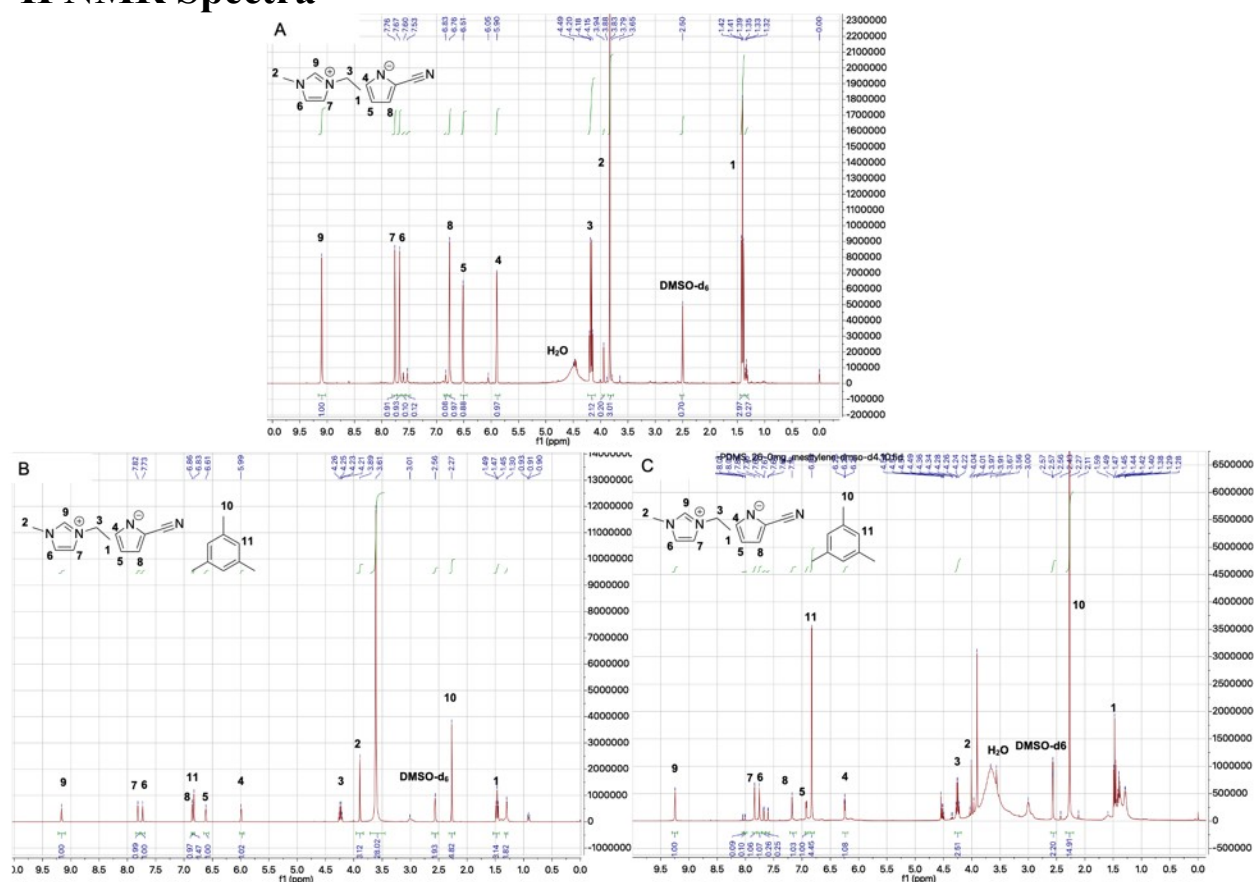

**Figure S5.**  $^1\text{H}$  NMR spectra of [EMIM][2CNpyr] in  $\text{DMSO-d}_6$  (A) in pure liquid form, (B) extracted from PDMS-PU capsules, and (C) extracted from GO-PDMS capsules with mesitylene used as an internal standard for both capsule types.

## Weight% Analysis

**Table S2.** Core wt% calculations using  $^1\text{H}$  NMR raw data analysis following the same procedure previously reported by Pentzer et al.<sup>1</sup>

|                                                                                                                                                                                  |                                                                                                                                                                                                                                                                               |                              |      |
|----------------------------------------------------------------------------------------------------------------------------------------------------------------------------------|-------------------------------------------------------------------------------------------------------------------------------------------------------------------------------------------------------------------------------------------------------------------------------|------------------------------|------|
| Scheme                                                                                                                                                                           | Extracting TSIL from capsules: $^1\text{H}$ NMR analysis                                                                                                                                                                                                                      |                              |      |
| Preparation method                                                                                                                                                               | PDMS-PU (or GO) capsules were weighed to ~20 mg and dispersed in 1 mL of 0.039M mesitylene in DMSO- $d_6$ solution. The dispersion was sonicated for 60 min to extract the liquid core. The TSIL solution was collected by syringe filtration and transferred to an NMR tube. |                              |      |
| Name of capsule sample                                                                                                                                                           | PDMS-PU                                                                                                                                                                                                                                                                       | GO-PDMS                      |      |
| Weight of sample used (mg)                                                                                                                                                       | 23.1                                                                                                                                                                                                                                                                          | 26.0                         |      |
| Mesitylene content present in the sample                                                                                                                                         | 0.039 mmol                                                                                                                                                                                                                                                                    |                              |      |
| Relative integration of the 4 hydrogens on the $sp^2$ carbons of TSIL (labeled 5, 6, 7, & 8 in <b>Figure S4</b> ) to the 3 hydrogens on the benzyl ring of mesitylene at 6.8 ppm | 1.49                                                                                                                                                                                                                                                                          | 0.70                         |      |
| Weight of [EMIM][2CNpyr] (mg)                                                                                                                                                    | 11.8                                                                                                                                                                                                                                                                          | 5.5                          |      |
| Average wt% [EMIM][2CNpyr]                                                                                                                                                       | 58.7                                                                                                                                                                                                                                                                          | 20                           |      |
| Preparation method (for GO-PDMS)                                                                                                                                                 | Gravimetrically by weighing the capsules and shells before and after grinding and washing the liquid core out                                                                                                                                                                 |                              |      |
| Sample #                                                                                                                                                                         | Weight before extraction (mg)                                                                                                                                                                                                                                                 | Weight after extraction (mg) | Wt%  |
| 1                                                                                                                                                                                | 14.95                                                                                                                                                                                                                                                                         | 8.66                         | 57.9 |
| 2                                                                                                                                                                                | 15.11                                                                                                                                                                                                                                                                         | 7.80                         | 51.6 |
| 3                                                                                                                                                                                | 15.25                                                                                                                                                                                                                                                                         | 7.74                         | 50.8 |
| 4                                                                                                                                                                                | 15.34                                                                                                                                                                                                                                                                         | 7.74                         | 50.5 |
| Average wt%                                                                                                                                                                      | 52.7                                                                                                                                                                                                                                                                          |                              |      |

## CO<sub>2</sub> Capture Performance

To understand how much these shell materials contribute to CO<sub>2</sub> uptake, hollow shells were created. This involved using a non-reactive IL, [BMIM][BF<sub>4</sub>], to form capsules, then extracting it to leave behind empty shells with the same PDMS-PU and GO-PDMS composition. It is important to note, however, that when using the TSIL, the shell composition slightly changes. During synthesis, the TSIL chemically interacts with the shell components, evident in the XPS data. Additionally, the TSIL tends to plasticize into the shell walls, leading to partial retention even after extraction. Thus, for a more accurate control study, capsules were made with [BMIM][BF<sub>4</sub>] and fully extracted to create hollow shells. The DAC capacities of these shells were gravimetrically measured to reach 0.04 and 0.03 mol kg<sup>-1</sup> for PDMS-PU and GO-PDMS, respectively (**Figure S6B**).

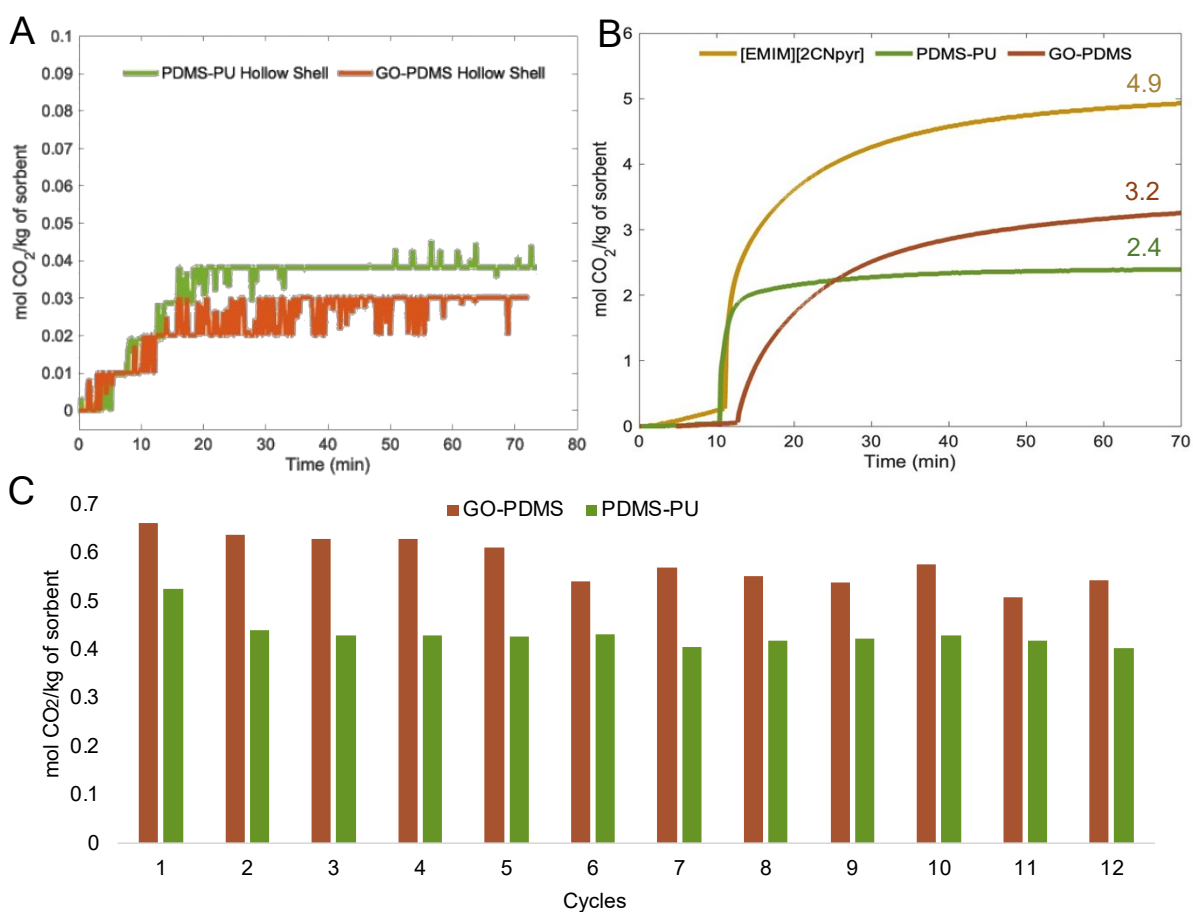

**Figure S6.** (A) TGA pure CO<sub>2</sub> sorption at 1 bar and 30 °C, and desorption at 65 °C under pure N<sub>2</sub> of [EMIM][2CNpyr] bulk, PDMS-PU, and GO-PDMS capsules. TGA 410 ppm CO<sub>2</sub> in N<sub>2</sub> (1 bar, 30 °C) (B) of hollow shells, and (C) sorption/desorption cycles of PDMS-PU and GO-PDMS capsules.

## RF Heating of PDMS-PU Capsules

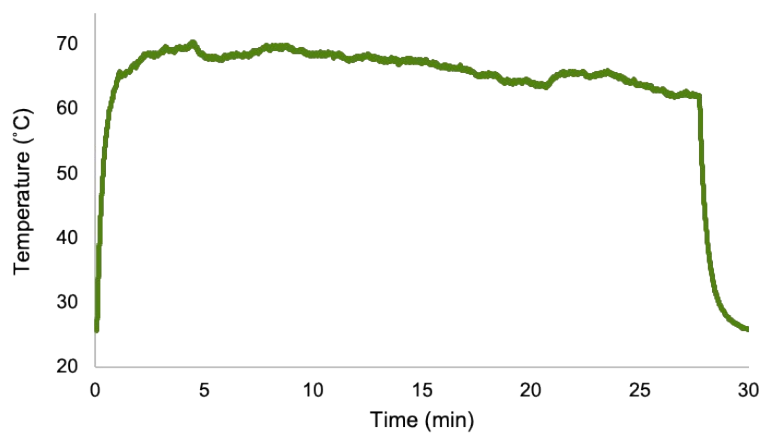

**Figure S7.** RF heating of PDMS-PU capsules at 1-2W and 123 MHz.

## CO<sub>2</sub> Capacity of PDMS-PU Capsules Before and After Soaking in Water

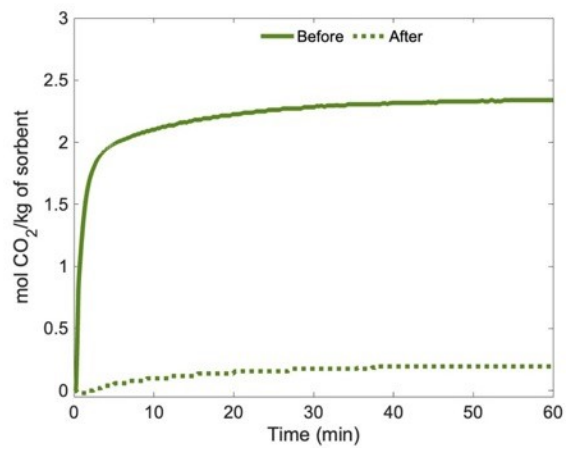

**Figure S8.** TGA pure CO<sub>2</sub> capacities (1 bar, 30 °C) of the PDMS-PU capsules before and after immersion in water for 24 hours.

## Optical Microscopy Images of Alternative Core Liquids

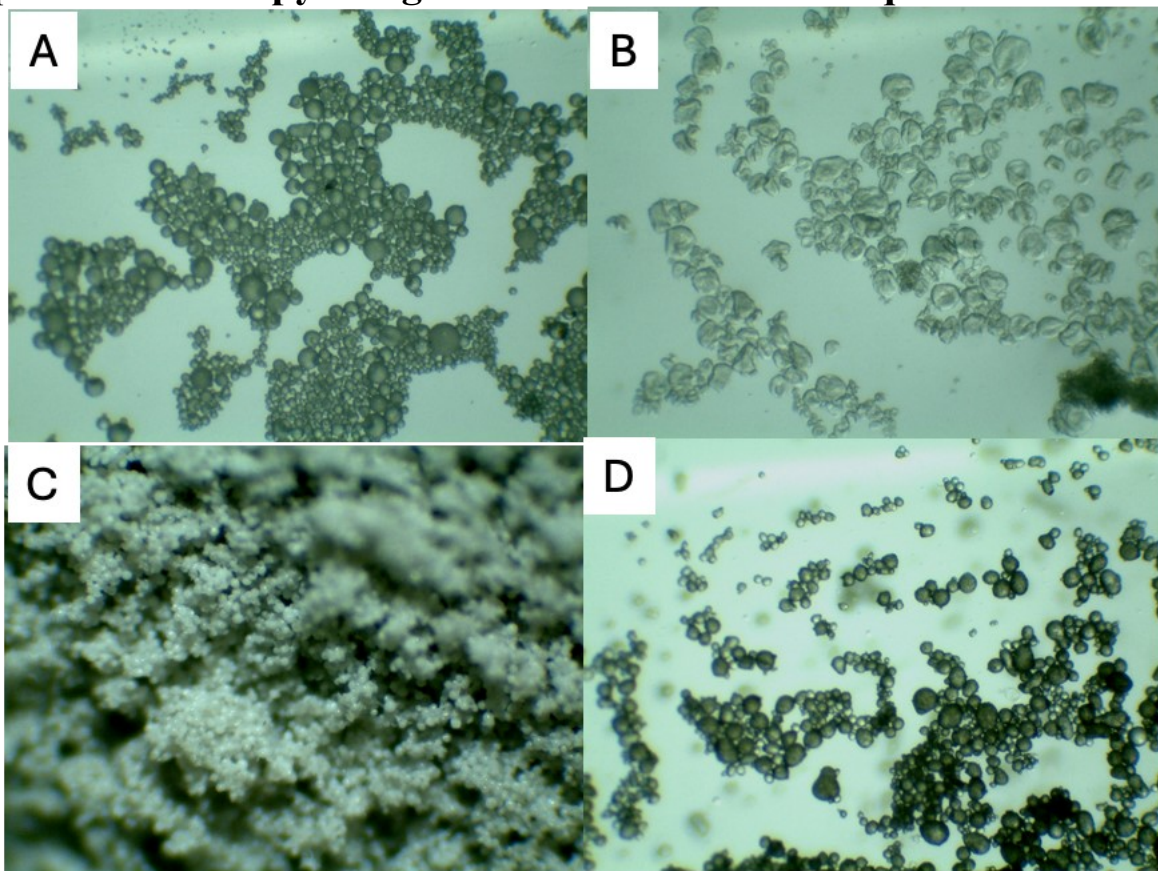

**Figure S9.** Optical microscopy images of (A,B) PDMS-PU and (C, D) GO-PDMS capsules of (A, C) [BMIM][BF<sub>4</sub>] core, and (B,D) PEI core.

## References

- (1) Gaur, S. S.; Edgehouse, K. J.; Klemm, A.; Wei, P.; Gurkan, B.; Pentzer, E. B. Capsules with Polyurea Shells and Ionic Liquid Cores for CO<sub>2</sub> Capture. *J. Polym. Sci.* **2021**, *59* (23), 2980–2989. <https://doi.org/10.1002/pol.20210342>.
